# Supplementary material
Source: ML conference proceedings conference paper supplement (https://proceedings.neurips.cc/paper_files/paper/2011/hash/cedebb6e872f539bef8c3f919874e9d7-Abstract.html)
Supplement: Supplementary file [file cedebb6e872f539bef8c3f919874e9d7-Supplemental.zip]

---

# Appendices

## Inferring Interaction Networks using the IBP applied to microRNA Target Prediction

---

### A Related work

Zhou et al. [3, 4] present a dependent hierarchical beta process using covariate-dependent features to impose that objects with similar covariates are likely to be clustered. The relationship between objects are summarized by a matrix  $\mathbf{A}$  using a kernel  $\mathcal{K}$ . One way to apply this prior to our biological application would require converting the prior likelihood  $\mathbf{C}$  matrix to the summary matrix, by defining a kernel over covariates. In contrast, our model avoids this requirement since all samples are drawn from a single process that encapsulates the dependencies.

### B Taking the infinite limit

**Lemma B.1.** *For any real numbers  $a_k (k \geq 1)$ , which are constants with respect to  $n$  and  $1 < T < \infty$ ,*

$$\lim_{n \rightarrow \infty} \left(1 + \sum_{k=1}^T \frac{a_k}{n^k}\right)^n = \exp(a_1) \quad (\text{B.1})$$

*Proof.* The limit is in the indeterminate form  $1^\infty$ , we apply a transformation and L'Hôpital's rule:

$$\lim_{n \rightarrow \infty} \left(1 + \sum_{k=1}^T \frac{a_k}{n^k}\right)^n = \exp \lim_{n \rightarrow \infty} \frac{\ln(1 + \sum_{k=1}^T \frac{a_k}{n^k})}{1/n} \quad (\text{transformation}) \quad (\text{B.2})$$

$$= \exp \lim_{n \rightarrow \infty} \frac{-\sum_{k=1}^T \frac{k a_k}{n^{k+1}} / (1 + \sum_{k=1}^T \frac{a_k}{n^k})}{-1/n^2} \quad (\text{L'Hôpital's rule}) \quad (\text{B.3})$$

$$= \exp \lim_{n \rightarrow \infty} \frac{\sum_{k=1}^T \frac{k a_k}{n^{k-1}}}{1 + \sum_{k=1}^T \frac{a_k}{n^k}} \quad (\text{B.4})$$

$$= \exp(a_1) \quad (\text{B.5})$$

□

Here we show that:

$$\lim_{K \rightarrow \infty} \frac{K!}{\prod_{h=0}^{2^N-1} K_h!} \prod_{k=1}^{K_+} \Phi_{z_k} \frac{B(m_k + \frac{\alpha}{K}, N - m_k + 1)}{B(\frac{\alpha}{K}, N + 1)} \prod_{k=1}^K \frac{1}{Z'} B(\frac{\alpha}{K}, N + 1) \quad (\text{B.6})$$

$$= \frac{\alpha^{K_+}}{\prod_{h=1}^{2^N-1} K_h!} \prod_{k=1}^{K_+} \Phi_{z_k} \frac{(N - m_k)!(m_k - 1)!}{N!} \exp(-\alpha \Psi) \quad (\text{B.7})$$

We consider each term separately.

$$\frac{K!}{\prod_{h=0}^{2^N-1} K_h!} \prod_{k=1}^{K_+} \Phi_{z_k} \frac{B(m_k + \frac{\alpha}{K}, N - m_k + 1)}{B(\frac{\alpha}{K}, N + 1)} \quad (\text{B.8})$$

$$= \frac{K!}{\prod_{h=0}^{2^N-1} K_h!} \prod_{k=1}^{K_+} \Phi_{z_k} \frac{\Gamma(\frac{\alpha}{K} + m_k) \Gamma(N - m_k + 1)}{\Gamma(\frac{\alpha}{K}) \Gamma(N + 1)} \quad (\text{B.9})$$

$$= \frac{K!}{\prod_{h=0}^{2^N-1} K_h!} \prod_{k=1}^{K_+} \Phi_{z_k} \frac{(N - m_k)! \frac{\alpha}{K} \prod_{j=1}^{m_k-1} (j + \frac{\alpha}{K})}{N!} \quad (\text{B.10})$$

$$= \frac{\alpha^{K_+}}{\prod_{h=1}^{2^N-1} K_h!} \frac{K!}{K_0! K^{K_+}} \prod_{k=1}^{K_+} \Phi_{z_k} \frac{(N - m_k)! \prod_{j=1}^{m_k-1} (j + \frac{\alpha}{K})}{N!} \quad (\text{B.11})$$

By the same argument as shown in [2],

$$\lim_{K \rightarrow \infty} \frac{K!}{\prod_{h=0}^{2^N-1} K_h!} \prod_{k=1}^{K_+} \Phi_{z_k} \frac{B(m_k + \frac{\alpha}{K}, N - m_k + 1)}{B(\frac{\alpha}{K}, N + 1)} \quad (\text{B.12})$$

$$= \frac{\alpha^{K_+}}{\prod_{h=1}^{2^N-1} K_h!} \prod_{k=1}^{K_+} \Phi_{z_k} \frac{(N - m_k)! (m_k - 1)!}{N!} \quad (\text{B.13})$$

$$\prod_{k=1}^K \frac{Z'}{B(\frac{\alpha}{K}, N + 1)} = \prod_{k=1}^K \frac{\sum_{h=0}^{2^N-1} \Phi_h B(\frac{\alpha}{K} + m_h, N - m_h + 1)}{B(\frac{\alpha}{K}, N + 1)} \quad (\text{B.14})$$

$$= \left( \sum_{h=0}^{2^N-1} \Phi_h \frac{\Gamma(\frac{\alpha}{K} + m_h) \Gamma(N - m_h + 1)}{\Gamma(\frac{\alpha}{K}) \Gamma(N + 1)} \right)^K \quad (\text{B.15})$$

$$= \left( 1 + \frac{\alpha}{K} \sum_{h=1}^{2^N-1} \Phi_h \frac{(N - m_h)! \prod_{j=1}^{m_h-1} (j + \frac{\alpha}{K})}{N!} \right)^K \quad (\text{B.16})$$

$$= \left( 1 + \frac{\alpha}{K} \sum_{h=1}^{2^N-1} \Phi_h \frac{(N - m_h)! (m_h - 1)!}{N!} + (\frac{\alpha}{K})^2 \dots + \dots \right)^K \quad (\text{B.17})$$

Using Lemma B.1, we get:

$$\lim_{K \rightarrow \infty} \prod_{k=1}^K \frac{Z'}{B(\frac{\alpha}{K}, N + 1)} = \exp \left( \alpha \sum_{h=1}^{2^N-1} \Phi_h \frac{(N - m_h)! (m_h - 1)!}{N!} \right) = \exp(\alpha \Psi) \quad (\text{B.18})$$

Combining (B.13) and (B.18), we arrive at (B.7).

## C The generative process

In Section 2.1.3, we described the generative process using a culinary metaphor. The customers select dishes one after the other as follows. The first customer tries  $\text{Poisson}(\alpha \Psi_1)$  dishes. The remaining customers enter one after the others. Customer  $i$  selects dishes with a probability that partially depends on the selection of the previous customers. For each dish, the probability that it would be selected is specified by:  $\sum_{h:h_i=z_{<i_k}, h(i)=1} \bar{\Phi}_h / \sum_{h:h_i=z_{<i_k}} \bar{\Phi}_h$ . He then samples a  $\text{Poisson}(\alpha \Psi_i)$  number of new dishes. This process repeats until all customers have made their selections.

We show here that this process simplifies to the Indian Buffet Process when  $\Phi_h = 1$  for all  $h$ .

**Lemma C.1.** *If  $\Phi_h = 1$  for all  $h$ ,*

$$\Psi_i = \frac{1}{i} \quad (\text{C.1})$$

*Therefore, each customer selects  $\text{Poisson}(\frac{\alpha}{i})$  new dishes as in the IBP.*

*Proof.*

$$\Psi_i = \sum_{h:h_i=0, h(i)=1} \bar{\Phi}_h \quad (\text{C.2})$$

$$= \sum_{h:h_i=0, h(i)=1} \frac{(N-m_h)!(m_h-1)!}{N!} \quad (\text{C.3})$$

$$= \sum_{t=0}^{N-i} \binom{N-i}{t} \frac{(N-t-1)!t!}{N!} \quad (\text{C.4})$$

$$= \frac{(i-1)!(N-i)!}{N!} \sum_{t=0}^{N-i} \binom{N-t-1}{i-1} \quad (\text{C.5})$$

$$= \frac{(i-1)!(N-i)!}{N!} \frac{N \binom{N-1}{i-1}}{i} \quad (\text{C.6})$$

$$= \frac{1}{i} \quad (\text{C.7})$$

□

**Lemma C.2.** *If  $\Phi_h = 1$  for all  $h$ ,*

$$\frac{\sum_{h:h_i=z_{<ik}, h(i)=1} \bar{\Phi}_h}{\sum_{h:h_i=z_{<ik}} \bar{\Phi}_h} = \frac{m_k}{i} \quad (\text{C.8})$$

*Therefore, each customer selects an old dish with probability  $\frac{m_k}{i}$  as in the IBP.*

*Proof.*

$$\sum_{h:h_i=z_{<ik}, h(i)=1} \bar{\Phi}_h = \sum_{h:h_i=z_{<ik}, h(i)=1} \frac{(N-m_h)!(m_h-1)!}{N!} \quad (\text{C.9})$$

$$= \sum_{t=0}^{N-i} \binom{N-i}{t} \frac{(N-t-m_k-1)!(t+m_k)!}{N!} \quad (\text{C.10})$$

$$= \frac{1}{(m_k+1) \binom{i}{m_k+1}} \quad (\text{C.11})$$

$$\sum_{h:h_i=z_{<ik}} \bar{\Phi}_h = \sum_{h:h_i=z_{<ik}} \frac{(N-m_h)!(m_h-1)!}{N!} \quad (\text{C.12})$$

$$= \sum_{t=0}^{N-i+1} \binom{N-i+1}{t} \frac{(N-t-m_k)!(t+m_k-1)!}{N!} \quad (\text{C.13})$$

$$= \sum_{t=0}^{N-i+1} \binom{N-i+1}{t} \frac{(N-t-m_k)!(t+m_k-1)!}{N!} \quad (\text{C.14})$$

$$= \frac{1}{m_k \binom{i-1}{m_k}} \quad (\text{C.15})$$

Together,

$$\frac{\sum_{h:h_i=z_{<ik}, h(i)=1} \bar{\Phi}_h}{\sum_{h:h_i=z_{<ik}} \bar{\Phi}_h} = \frac{m_k \binom{i-1}{m_k}}{(m_k+1) \binom{i}{m_k+1}} \quad (\text{C.16})$$

$$= \frac{m_k}{i} \quad (\text{C.17})$$

□

Furthermore, an equivalence class  $[\mathbf{Z}]$  can be represented by a frequency vector  $\mathbf{K} = (K_1, \dots, K_{2^N-1})$ . We can define a distribution on  $\mathbf{K}$  by assuming that each  $K_h$  is generated independently by a Poisson distribution with parameters  $\alpha\bar{\Phi}_h$ . The probability is given by:

$$P(\mathbf{K}) = \prod_{h=1}^{2^N-1} \frac{(\alpha\bar{\Phi}_h)^{K_h}}{K_h!} \exp(-\alpha\bar{\Phi}_h) \quad (\text{C.18})$$

This could be easily seen to be the same as Equation (8).

## D GO results for clusters in Figure 4

Table D.1, D.2 and D.3 show the GO enrichment results for cluster (b), (c) and (f) in Figure 4 by GStat[1]. We only show terms with corrected P-value less than 0.01. Cluster (a), (d) and (f) have no significant terms.

| Term ID  | Description        | P value  |
|----------|--------------------|----------|
| GO:22402 | cell cycle process | 7.32E-05 |
| GO:7049  | cell cycle         | 1.77E-04 |
| GO:22403 | cell cycle phase   | 3.17E-04 |
| GO:278   | mitotic cell cycle | 2.94E-03 |
| GO:279   | M phase            | 2.94E-03 |

Table D.1: GO enrichment analysis of cluster (b) in Figure 4

| Term ID  | Description                                                                  | P value  |
|----------|------------------------------------------------------------------------------|----------|
| GO:724   | double-strand break repair via homologous recombination                      | 3.29E-03 |
| GO:725   | recombinational repair                                                       | 3.29E-03 |
| GO:6281  | DNA repair                                                                   | 3.29E-03 |
| GO:6974  | response to DNA damage stimulus                                              | 3.93E-03 |
| GO:6310  | DNA recombination                                                            | 3.93E-03 |
| GO:9314  | response to radiation                                                        | 3.93E-03 |
| GO:9719  | response to endogenous stimulus                                              | 3.93E-03 |
| GO:51053 | negative regulation of DNA metabolic process                                 | 3.93E-03 |
| GO:8630  | DNA damage response, signal transduction resulting in induction of apoptosis | 4.13E-03 |
| GO:6302  | double-strand break repair                                                   | 4.78E-03 |
| GO:51052 | regulation of DNA metabolic process                                          | 4.78E-03 |
| GO:10212 | response to ionizing radiation                                               | 4.78E-03 |
| GO:9411  | response to UV                                                               | 6.28E-03 |
| GO:7568  | aging                                                                        | 7.34E-03 |
| GO:8629  | induction of apoptosis by intracellular signals                              | 7.87E-03 |
| GO:6996  | organelle organization                                                       | 9.95E-03 |
| GO:9628  | response to abiotic stimulus                                                 | 9.95E-03 |
| GO:42770 | DNA damage response, signal transduction                                     | 9.95E-03 |

Table D.2: GO enrichment analysis of cluster (c) in Figure 4

| Term ID  | Description                           | P value  |
|----------|---------------------------------------|----------|
| GO:45859 | regulation of protein kinase activity | 8.83E-03 |
| GO:51338 | regulation of transferase activity    | 8.83E-03 |
| GO:165   | MAPKKK cascade                        | 8.83E-03 |

Table D.3: GO enrichment analysis of cluster (f) in Figure 4

## E GenMiR++

Figure E.1 shows the network inferred by GenMiR++ with threshold of 0.9. We did not find any significant enrichment with corrected P-value less than 0.01.

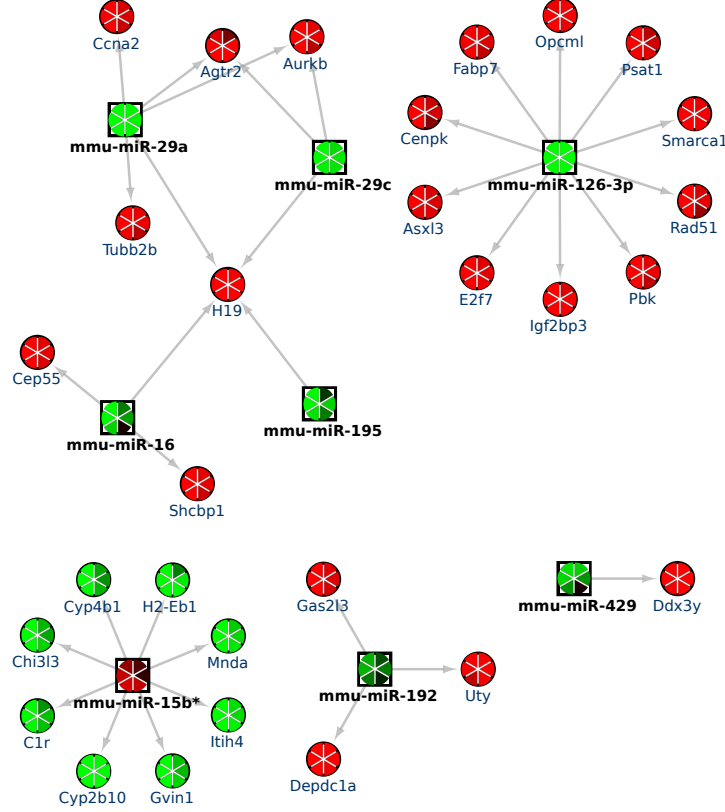

Figure E.1: GenMiR++ with threshold = 0.9

## F Comparison with K-means

We ran K-means on the same set of mRNAs in Figure 4 using  $k = 6$  as inferred by GroupMiR. We did not find any significant enrichment indicating that only by integrating sets of miRNAs with the mRNAs for this data we can find functional biological groupings.

## G Comparison to IBP

We also tested with the original IBP ( $\mathbf{W} = 0$ ). Not surprisingly, the results for both the synthetic and real data were weak (the IBP is of course not intended for our data since it cannot use the prior interaction information). Specifically, for the synthetic data the average F1 when using a noise level of 0.4 (a high but reasonable level) is 0.8418 for our method and only 0.5163 for the original IBP. For the real data, the IBP failed to recover any significant groupings. Without the priors the ability to identify significant interactions is greatly weakened.

## H Networks at 60% posterior probability.

We also report networks constructed with 60% posterior probability by GroupMiR in Figure H.1 and 0.6 threshold by GenMiR++ in Figure H.2.

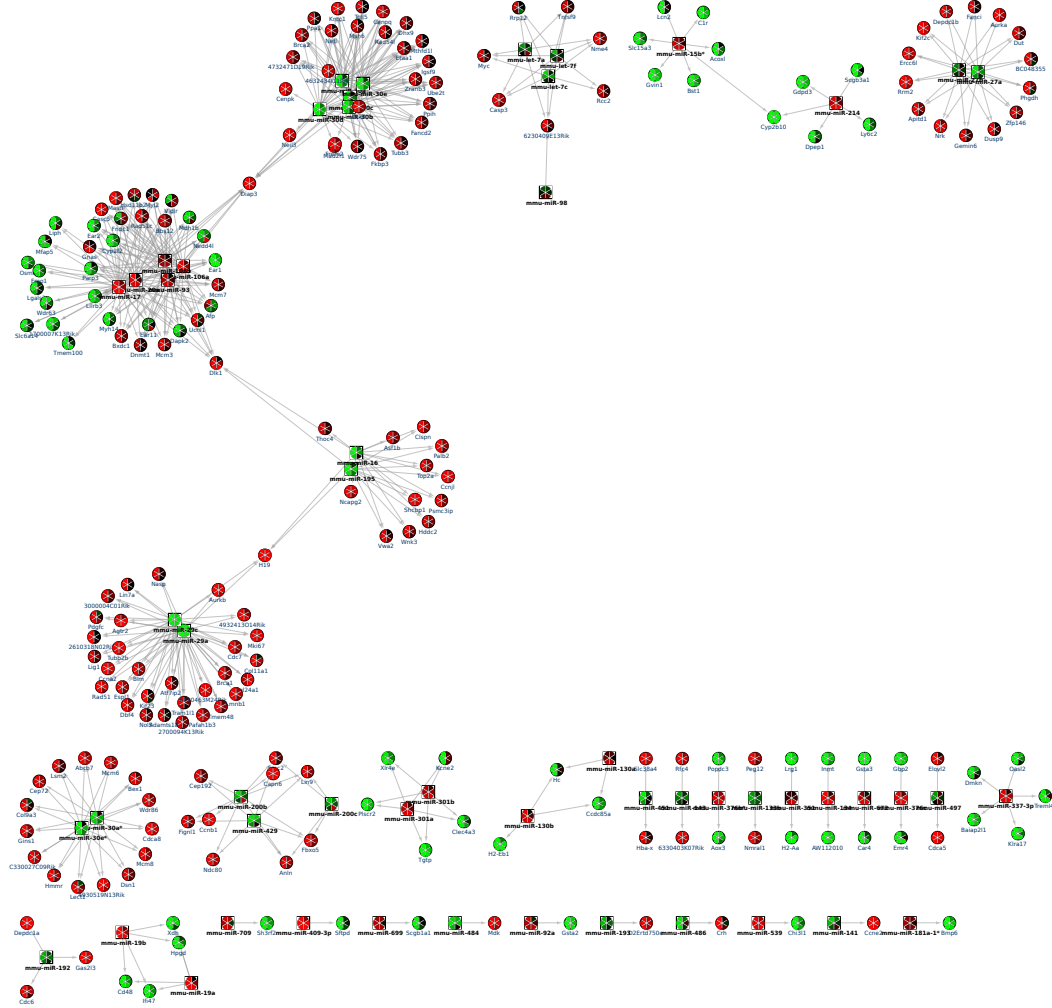

Figure H.1: Network inferred by GroupMiR with 60% posterior probability

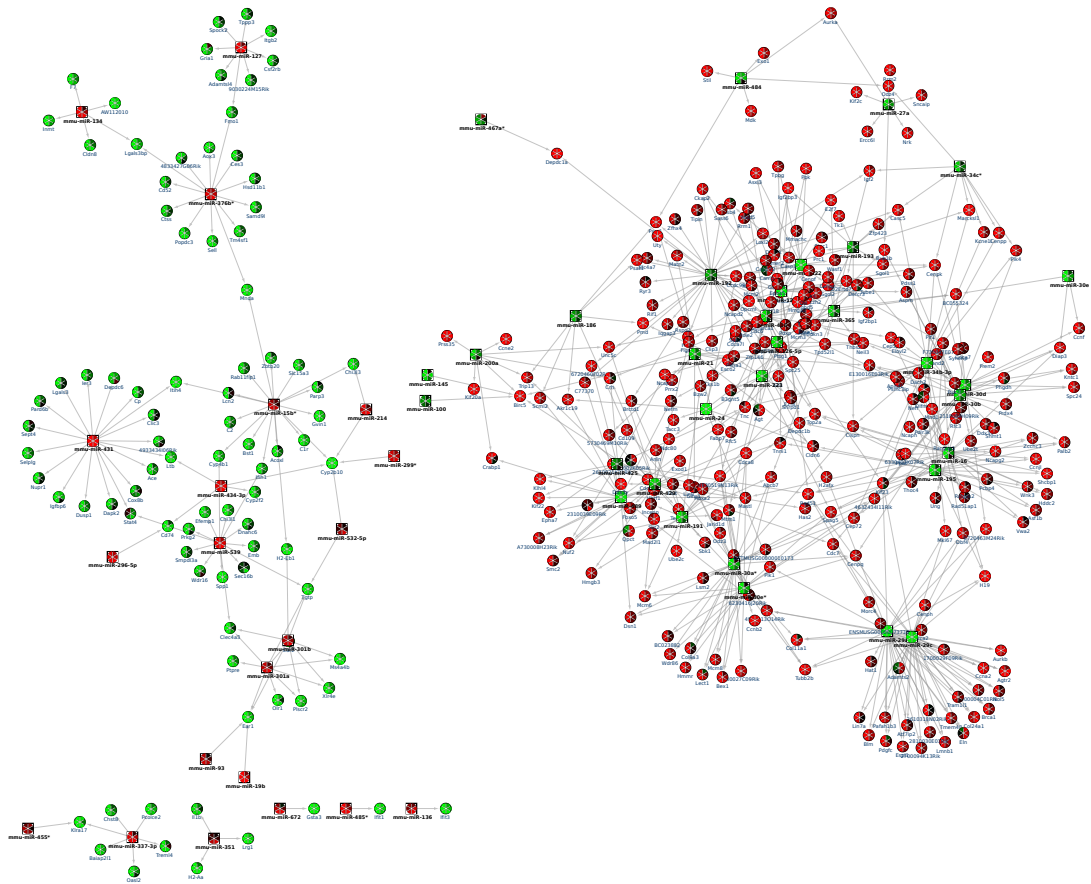

Figure H.2: Network inferred by GenMiR++ with threshold of 0.6

## References

- [1] T. Beißbarth and T.P. Speed. Gostat: find statistically overrepresented Gene Ontologies within a group of genes. *Bioinformatics*, 20(9):1464, 2004.
- [2] T. Griffiths and Z. Ghahramani. Infinite latent feature models and the Indian buffet process. *In Advances in Neural Information Processing Systems*, 18:475, 2006.
- [3] M. Zhou, H. Yang, G. Sapiro, D. Dunson, and L. Carin. Dependent hierarchical beta process for image interpolation and denoising. *Proc. Artificial Intelligence and Statistics (AISTATS)*, 2011.
- [4] Mingyuan Zhou, Hongxia Yang, Guillermo Sapiro, David B. Dunson, and Lawrence Carin. Covariate-dependent dictionary learning and sparse coding. *In ICASSP*, pages 5824–5827. IEEE, 2011.
